# Supplementary material
Source: PubMed Central journal article supplement (PMC9729427)
Supplement: NIHMS1838936-supplement-1.pdf [file NIHMS1838936-supplement-1.pdf]

Supplementary Table 1. Distribution of dysplasia and cancer diagnoses by group

|                                     | Cervix<br>(N=250) | Vagina<br>(N=28) | Vulva<br>(N=46) |
|-------------------------------------|-------------------|------------------|-----------------|
| <b>Diagnosis, n (%)</b>             |                   |                  |                 |
| CIN2                                | 124 (49.6%)       |                  |                 |
| CIN3                                | 133 (53.2%)       |                  |                 |
| AIS                                 | 8 (3.2%)          |                  |                 |
| HSIL                                | 8 (3.2%)          |                  |                 |
| HSIL (on pap smear only)            | 13 (5.2%)         | 4 (14.3%)        |                 |
| VAIN2                               | 2 (0.8%)          | 11 (39.3%)       |                 |
| VAIN3                               | 2 (0.8%)          | 16 (57.1%)       |                 |
| VIN2                                |                   |                  | 15 (32.6%)      |
| VIN3                                |                   |                  | 34 (73.9%)      |
| Adenocarcinoma                      | 6 (2.4%)          |                  |                 |
| Adenosquamous Carcinoma             | 1 (0.4%)          |                  |                 |
| Carcinoma                           | 1 (0.4%)          |                  |                 |
| Squamous Cell Carcinoma             | 12 (4.8%)         |                  | 5 (10.9%)       |
| Large Cell Neuroendocrine Carcinoma | 1 (0.4%)          |                  |                 |

Two patients had cervical diagnosis CIN2/CIN3 and vaginal diagnosis VAIN2/VAIN3. They are included in the Cervix column. Patients may have had more than one diagnosis.
