# Supplementary material
Source: PubMed Central journal article supplement (PMC9729427)
Supplement: NIHMS1838936-supplement-2.pdf [file NIHMS1838936-supplement-2.pdf]

Supplementary Table 2. Distribution of HPV results by cytology status for each disease site

|                                        | Anal Cytology |            |            |              |            |            |
|----------------------------------------|---------------|------------|------------|--------------|------------|------------|
|                                        | Normal        | ASCUS      | LSIL/AIN 1 | HSIL/AIN 2-3 | ASC-H      | Missing    |
| <b>Cervical Disease, n (%)</b>         | N=177         | N=42       | N=5        | N=1          | N=6        | N=19       |
| Positive 16                            | 11 (6.2%)     | 5 (11.9%)  | 1 (20.0%)  |              | 1 (16.7%)  |            |
| Positive 18                            | 3 (1.7%)      | 2 (4.8%)   |            |              | 1 (16.7%)  |            |
| Positive High-Risk Types               | 32 (18.1%)    | 13 (31.0%) | 3 (60.0%)  | 1 (100.0%)   | 5 (83.3%)  | 1 (5.3%)   |
| Positive High-Risk Types / Positive 16 | 3 (1.7%)      | 3 (7.1%)   | 1 (20.0%)  |              | 1 (16.7%)  |            |
| Positive High-Risk Types / Positive 18 | 1 (0.6%)      |            |            |              |            |            |
| Negative                               | 123 (69.5%)   | 22 (52.4%) | 2 (40.0%)  |              |            | 2 (10.5%)  |
| Insufficient for Diagnosis             | 12 (6.8%)     | 3 (7.1%)   |            |              |            | 15 (78.9%) |
| Missing                                |               |            |            |              |            | 1          |
| <b>Vaginal Disease, n (%)</b>          | N=22          | N=4        | N=1        |              | N=1        |            |
| Positive 16                            | 2 (9.1%)      |            |            |              |            |            |
| Positive High-Risk Types               | 3 (13.6%)     | 1 (25.0%)  | 1 (100.0%) |              |            |            |
| Positive High-Risk Types / Positive 16 | 1 (4.5%)      |            |            |              |            |            |
| Negative                               | 15 (68.2%)    | 3 (75.0%)  |            |              | 1 (100.0%) |            |
| Insufficient for Diagnosis             | 3 (13.6%)     |            |            |              |            |            |
| <b>Vulvar Disease, n (%)</b>           | N=34          | N=9        |            |              | N=1        | N=2        |
| Positive 16                            | 1 (29.4%)     | 1 (11.1%)  |            |              | 1 (100.0%) | 1 (50.0%)  |
| Positive High-Risk Types               | 9 (26.5%)     | 3 (33.3%)  |            |              |            |            |
| Negative                               | 21 (61.8%)    | 5 (55.6%)  |            |              |            | 1 (50.0%)  |
| Insufficient for Diagnosis             | 2 (5.9%)      |            |            |              |            |            |
| Missing                                | 1             |            |            |              |            |            |

Two patients had cervical diagnosis CIN2/CIN3 and vaginal diagnosis VAIN2/VAIN3. They are included in the Cervical Disease group. Patients in the "Positive High-Risk Types / Positive 16" row also appear in the "Positive 16" row and in the "Positive High-Risk Types" row. Patients in the "Positive High-Risk Types / Positive 18" row also appear in the "Positive 18" row and in the "Positive High-Risk Types" row.
