# Supplementary material
Source: PubMed Central journal article supplement (PMC9729427)
Supplement: NIHMS1838936-supplement-3.pdf [file NIHMS1838936-supplement-3.pdf]

Supplementary Table 3. Anal cytology, histology, and HPV testing by diagnosis of dysplasia vs cancer

|                                       | CIN2/CIN3/HSIL/AIS<br>(N=229) | Cervical Cancer<br>(N=21) | VAIN2/VAIN3/HSIL<br>(N=28) | VIN2/VIN3<br>(N=41) | Vulvar Cancer<br>(N=5) |
|---------------------------------------|-------------------------------|---------------------------|----------------------------|---------------------|------------------------|
| <b>Age</b>                            |                               |                           |                            |                     |                        |
| Median (IQR)                          | 41 (34, 51)                   | 43 (38, 52)               | 57 (48, 62)                | 60 (52, 65)         | 62 (51, 63)            |
| <b>Anal Pap Smear Result, n (%)</b>   |                               |                           |                            |                     |                        |
| Normal                                | 164 (74.9%)                   | 13 (72.2%)                | 22 (78.6%)                 | 30 (75.0%)          | 4 (80%)                |
| ASCUS                                 | 37 (16.9%)                    | 5 (27.8%)                 | 4 (14.3%)                  | 8 (20.0%)           | 1 (100%)               |
| LSIL/AIN 1                            | 5 (2.3%)                      |                           | 1 (3.6%)                   |                     |                        |
| HSIL/AIN 2-3                          | 1 (0.5%)                      |                           |                            |                     |                        |
| ASC-H                                 | 6 (2.7%)                      |                           | 1 (3.6%)                   | 1 (2.5%)            |                        |
| Insufficient                          | 6 (2.7%)                      |                           |                            | 1 (2.5%)            |                        |
| Missing                               | 10                            | 3                         |                            | 1                   |                        |
| <b>Anal Biopsy Result, n (%)</b>      |                               |                           |                            |                     |                        |
| Neg. for intraepithelial neoplasia    | 8 (3.5%)                      | 1 (4.8%)                  |                            | 2 (4.9%)            |                        |
| LGAIN                                 | 1 (0.4%)                      |                           |                            |                     |                        |
| HGAIN                                 | 2 (0.9%)                      |                           |                            |                     |                        |
| <b>Anal HPV Testing Result, n (%)</b> |                               |                           |                            |                     |                        |
| Total hrHPV Positive                  | 67 (29%)                      | 3 (15%)                   | 6 (21%)                    | 15 (38%)            | 1 (20%)                |
| Total hrHPV Negative                  | 136 (59%)                     | 13 (65%)                  | 19 (68%)                   | 23 (58%)            | 4 (80%)                |
| Insufficient                          | 26 (11%)                      | 4 (20%)                   | 3 (11%)                    | 2 (5%)              |                        |
| Missing                               |                               | 1                         |                            | 1                   |                        |

Two patients had cervical diagnosis CIN2/CIN3 and vaginal diagnosis VAIN2/VAIN3. They are included in the first column.
